# Supplementary material for: Pre-industrial temperature variability on the Swiss Plateau derived from the instrumental daily series of Bern and Zurich
Source: Copernicus journal article supplement (doi:10.5194/cp-18-2357-2022), 2022-10-25
Supplement: Supplementary file 1 [file cp-18-2357-2022-supplement.zip]

Archive with 4 entries (4 files):
- Bern_breakpoints_ta.csv
- Zurich_breakpoints_ta.csv
- Reference_series.pdf
- cp-18-2357-2022-supplement-title-page.pdf
