# Supplementary material for: Pre-industrial temperature variability on the Swiss Plateau derived from the instrumental daily series of Bern and Zurich
Source: Copernicus journal article supplement (doi:10.5194/cp-18-2357-2022), 2022-10-25
Supplement: Supplementary file 1 [file cp-18-2357-2022-supplement.zip › Bern_breakpoints_ta.csv]

Station	Date	Metadata	Notes
Tavel	28.02.1762	X	New thermometer
Tavel	31.03.1767		Data gap between July 1766 – March 1767
Studer	21.05.1781		Data gap between 16-21 May
Studer	28.02.1783
Studer	28.09.1787		Data gap between 18-28 September
Sutz	31.03.1788
Studer	30.09.1805
Studer	23.01.1808		Primary thermometer stopped reporting for a few days, a third reading is given instead
Studer	06.11.1809	X	New thermometer
Studer	03.10.1817		Data gap between 3-10 October
Fueter	31.08.1820
Fueter	31.10.1824		Change of reporting style (2nd spirit thermometer no longer reported)
Fueter	31.12.1825		Possible change in observation time/practice in the morning
Trechsel	31.03.1831
Trechsel	30.09.1833
Trechsel	30.04.1837
Trechsel	15.10.1840		Many gaps in September and in the first half of October
Benoit	30.09.1847
Koch	30.06.1857
Burgdorf	31.12.1853		Long gap
Burgdorf	30.06.1861
Burgdorf	31.03.1864
