# Supplementary material for: Pre-industrial temperature variability on the Swiss Plateau derived from the instrumental daily series of Bern and Zurich
Source: Copernicus journal article supplement (doi:10.5194/cp-18-2357-2022), 2022-10-25
Supplement: Supplementary file 1 [file cp-18-2357-2022-supplement.zip › cp-18-2357-2022-supplement-title-page.pdf]

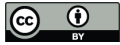

*Supplement of*

**Pre-industrial temperature variability on the Swiss Plateau  
derived from the instrumental daily series of Bern and Zurich**

**Yuri Brugnara et al.**

*Correspondence to:* Yuri Brugnara ([yuri.brugnara@giub.unibe.ch](mailto:yuri.brugnara@giub.unibe.ch))

- [cp-18-2357-2022-supplement-title-page.pdf](#)
- [Bern\\_breakpoints\\_ta.csv](#)
- [Reference\\_series.pdf](#)
- [Zurich\\_breakpoints\\_ta.csv](#)

The copyright of individual parts of the supplement might differ from the article licence.
