# Supplementary material for: Pre-industrial temperature variability on the Swiss Plateau derived from the instrumental daily series of Bern and Zurich
Source: Copernicus journal article supplement (doi:10.5194/cp-18-2357-2022), 2022-10-25
Supplement: Supplementary file 1 [file cp-18-2357-2022-supplement.zip › Zurich_breakpoints_ta.csv]

Station	Date	Metadata	Notes
Meyer	31.05.1761	X	Change in the number of observations per day available
Meyer	31.12.1762	X	Change in the number of observations per day available
Muralt	31.12.1769	X	Change in the number of observations per day available
Muralt	30.04.1779	X	Change in the number of observations per day available and data gap
Muralt	30.06.1782
Muralt	31.05.1788
Muralt	31.12.1788
Muralt	30.06.1790
Hirzel	31.12.1762		Long gap
Hirzel	31.12.1767		Short data gap
Hirzel	30.09.1768
Hirzel	13.10.1774		Short data gap
Hirzel	31.12.1780		Long gap
Hirzel	31.12.1781		Short data gap
Hirzel	16.10.1797		Short data gap
Feer	30.04.1808		Many small gaps
Feer	30.06.1817
Hofmeister	28.08.1835	X	Probable relocation
Hofmeister	08.11.1836	X	New thermometer
NGZ	08.11.1836	X	New thermometer
NGZ	31.12.1846		Change in the style of data publication
NGZ	31.12.1848	X	Change in the number of observations per day available
NGZ	31.12.1851	X	Change in the number of observations per day available
Kuesnacht	31.03.1854
Kuesnacht	30.09.1854
Kuesnacht	08.12.1855		Short data gap
Winterthur	30.09.1859
